# Supplementary material
Source: publisher figshare collection journal article supplement (https://future-science-group.figshare.com/ndownloader/files/34810171)

# **Supplemental Material**

## Supplemental Figure 1: Median Overall Survival From Ruxolitinib Based on Total Daily Dose at Initiation


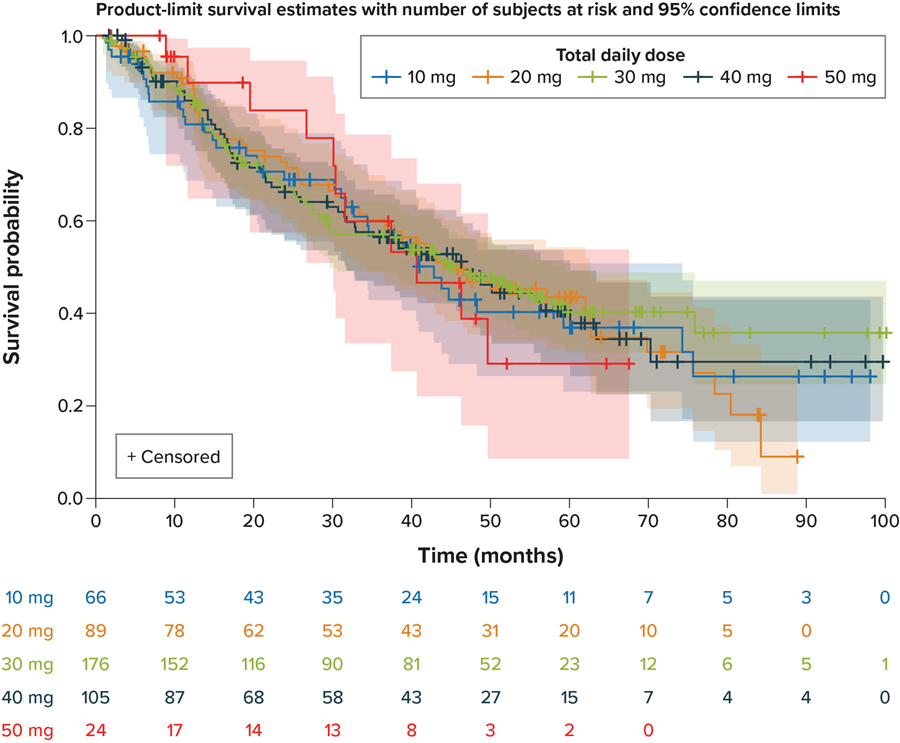

Supplement: Supplementary file 1 [file 34810171]
